# Supplementary material
Source: Springer Nature journal article supplement (https://www.springermedizin.de/resource/supplementary/12913_2006_252_MOESM3_ESM.pdf/9534692)

# Data flowchart

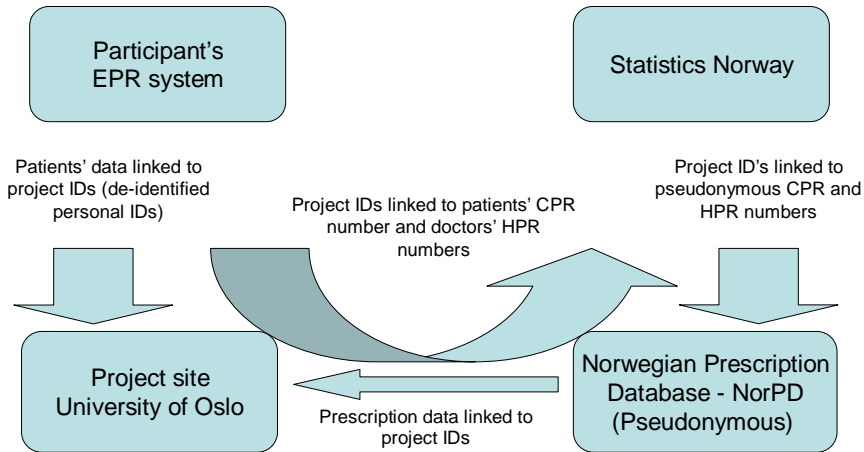

Supplement: MOESM3 [file 9534692]
